# Supplementary material for: Comparing Efficacy and Safety of Bridging Therapy versus Endovascular Thrombectomy in Acute Basilar Artery Occlusion: A Systematic Review and Meta-analysis
Source: Research Square preprint supplement (doi:10.21203/rs.3.rs-7312828/v1), 2025-10-16
Supplement: Supplementary file 1 [file 9c02dea94303ae2d6afd0636.docx]

**Supplementary File**

**Index**

**Supplementary Table 1:** Search strategies used in different electronic databases

**Supplementary Table 2:** Newcastle Ottawa Scale for the quality assessment of the non-randomized studies

**Supplementary Figure 1:** Functional independence funnel plot

**Supplementary Figure 2:** Independent ambulation funnel plot

**Supplementary Figure 3:** Successful recanalization funnel plot

**Supplementary Figure 4:** Mortality funnel plot

**Supplementary Figure 5:** Spontaneous intracerebral hemorrhage funnel plot

**Supplementary Figure 6:** Functional independence, Egger’s regression test

**Supplementary Figure 7:** Independent ambulation, Egger’s regression test

**Supplementary Figure 8:** Successful recanalization, Egger’s regression test

**Supplementary Figure 9:** Mortality, Egger’s regression test

**Supplementary Figure 10:** Spontaneous intracerebral hemorrhage, Egger’s regression test

| **Supplementary Table 1:** Search strategies used in different electronic databases | | |
| --- | --- | --- |
| **Databases** | **Search string** | **Articles retrieved** |
| PubMed | ("Stroke"[MeSH Terms] OR "Ischemic Stroke"[All Fields] OR "Ischaemic Stroke"[All Fields] OR "Cryptogenic Stroke"[All Fields] OR "Acute Ischemic Stroke"[All Fields] OR "Wake-up Stroke"[All Fields] OR "Cerebrovascular Accident"[All Fields] OR "Apoplexy"[All Fields] OR "Cerebral Stroke"[All Fields] OR "Thrombotic Stroke"[All Fields] OR "Brain Attack"[All Fields] OR "Cerebral Insult"[All Fields] OR "Cerebrovascular Occlusion"[All Fields] OR "Ischemic Seizure"[All Fields] OR (("thrombose"[All Fields] OR "thrombosing"[All Fields] OR "thrombosis"[MeSH Terms] OR "thrombosis"[All Fields] OR "thrombosed"[All Fields] OR "thromboses"[All Fields]) AND "cerebrovascular"[All Fields])) AND ("Basilar Artery"[MeSH Terms] OR "Basilar Artery"[All Fields] OR "Basilar Arteries"[All Fields]) AND ("Thrombolytic Therapy"[MeSH Terms] OR "Thrombolysis"[All Fields] OR "Therapeutic Thrombolysis"[All Fields] OR "Fibrinolytic Therapy"[All Fields] OR "Intravenous Alteplase"[All Fields]) AND ("Thrombectomy"[MeSH Terms] OR "Thrombectomy"[All Fields] OR "Endovascular Therapy"[All Fields] OR "Percutaneous Aspiration Thrombectomy"[All Fields]) | 278 |
| Cochrane Central | ("Stroke" OR "Ischemic Stroke" OR "Ischaemic Stroke" OR "Cryptogenic Stroke" OR "Acute Ischemic Stroke" OR "Wake-up Stroke" OR "Cerebrovascular Accident" OR "Apoplexy" OR "Cerebral Stroke" OR "Thrombotic Stroke" OR "Brain Attack" OR "Cerebral Insult" OR "Cerebrovascular Occlusion" OR "Ischemic Seizure" OR "Thrombosis, Cerebrovascular") AND ("Basilar Artery" OR "Basilar Artery" OR "Basilar Arteries") AND ("Thrombolytic Therapy" OR "Thrombolysis" OR "Therapeutic Thrombolysis" OR "Fibrinolytic Therapy" OR "Intravenous Alteplase") AND ("Thrombectomy" OR "Thrombectomy" OR "Endovascular Therapy" OR "Percutaneous Aspiration Thrombectomy") | 57 |
| ScienceDirect | ("Stroke" OR "Ischemic Stroke" OR "Ischaemic Stroke" OR "Cerebrovascular Occlusion") AND ("Basilar Artery") AND ("Thrombolytic Therapy" OR "Thrombolysis") AND ("Thrombectomy" OR "Endovascular Therapy") | 1,331 |

| **Study** | **Item & score** | | | | | | | | |
| --- | --- | --- | --- | --- | --- | --- | --- | --- | --- |
| **Selection** | | | | **Comparability** | **Outcome** | | |  |
| **Representativeness**  **of the exposed cohort（1）** | **Selection of the**  **non-exposed cohort（1)** | **Ascertainment of exposure**  **（1）** | **Demonstration that outcome of interest was not present at start of**  **study（1）** | **Compare ability of cohorts based on the design or analysis**  **（2）** | **Assessment of outcome**  **（1）** | **Was follow up long enough for outcomes to**  **occur（1）** | **Adequacy of**  **follow up of cohorts（1）** | **Total** |
| Knapen et al. 2024 | * | * | * | * | ** | - | * | - | **7** |
| Feil et al. 2023 | * | - | * | * | ** | - | * | * | **7** |
| Guo et al. 2024 | * | * | * | * | ** | * | * | * | **9** |
| Kaneko et al.  2019 | * | * | * | * | * | - | - | * | **6** |
| Singer et al.  2015 | * | * | * | * | * | - | * | * | **7** |
| Uno et al.  2017 | * | - | * | * | * | - | * | * | **6** |
| Siow et al.  2022 | * | * | * | * | ** | - | * | - | **7** |
| Nappini et al.  2021 | * | * | * | * | ** | - | * | * | **8** |
| Nie et al.  2022 | * | * | * | * | ** | * | * | * | **9** |
| Yang et al.  2024 | * | * | * | * | ** | - | * | * | **8** |
| Maier et al. 2023 | * | * | * | * | * | * | * | - | **7** |

**Supplementary Table 2:** Newcastle Ottawa Scale for the quality assessment

**
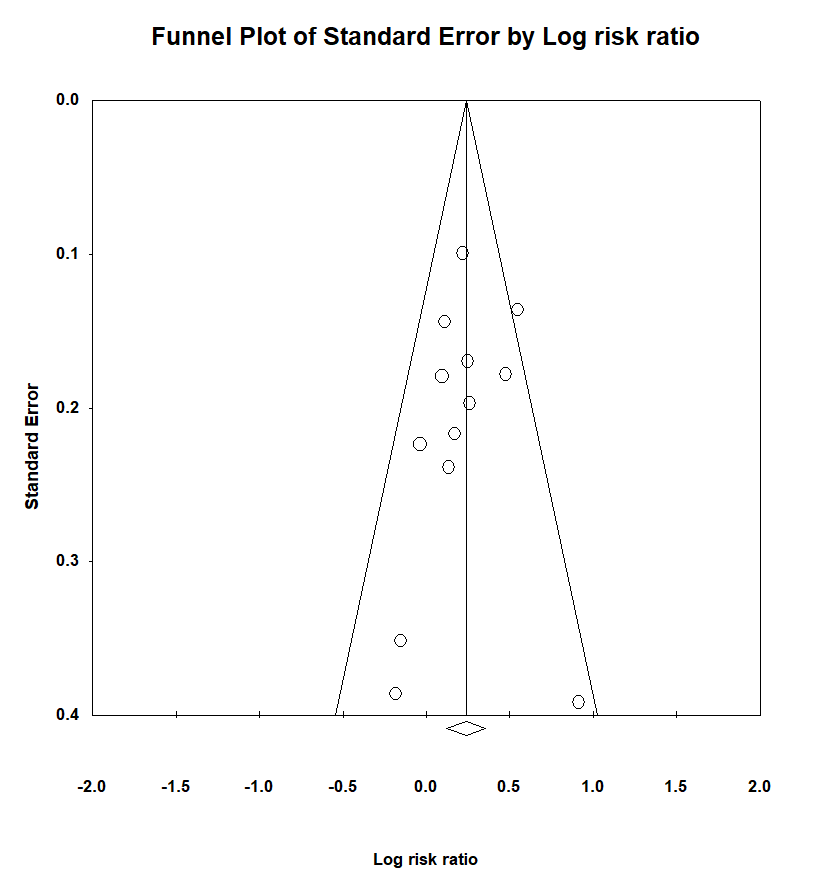
**

**Supplementary Figure 1:** Functional independence funnel plot

**
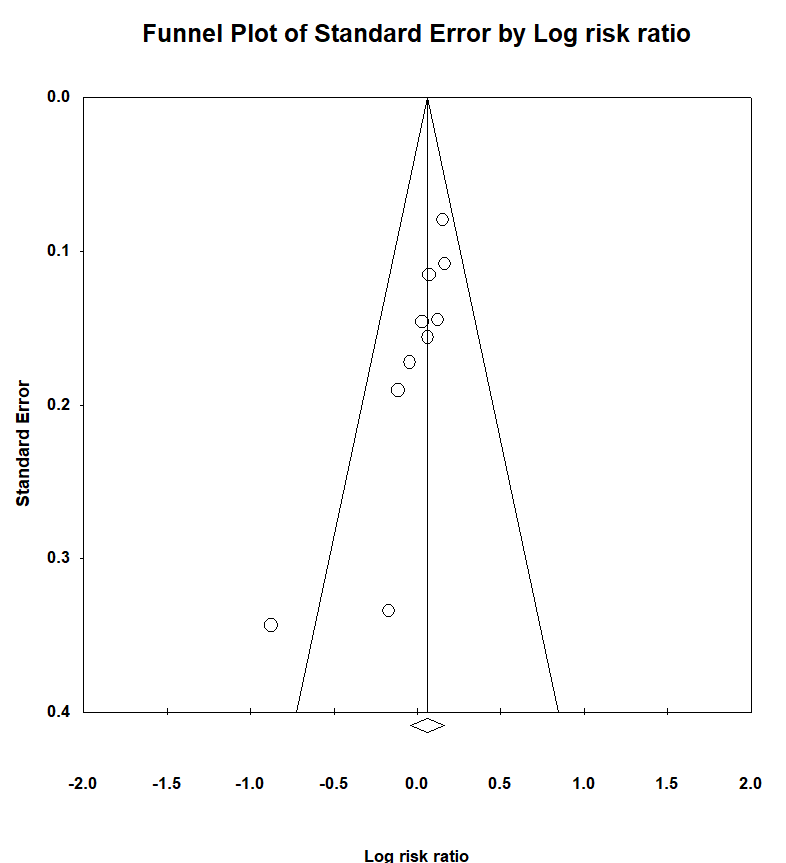
**

**Supplementary Figure 2:** Independent ambulation funnel plot

**
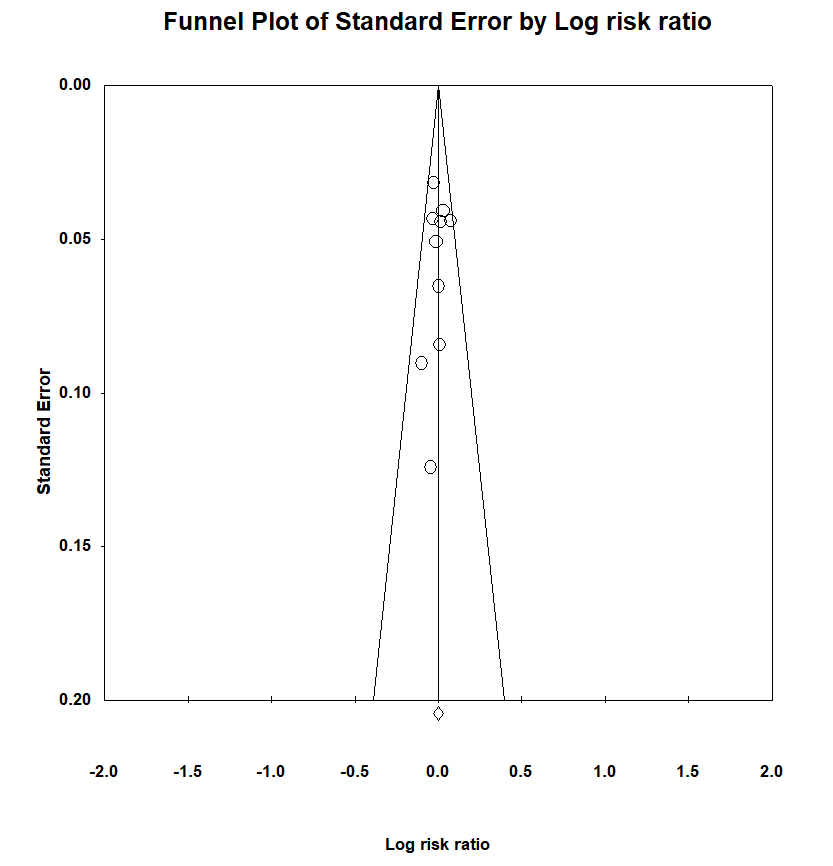
**

**Supplementary Figure 3:** Successful recanalization funnel plot

**
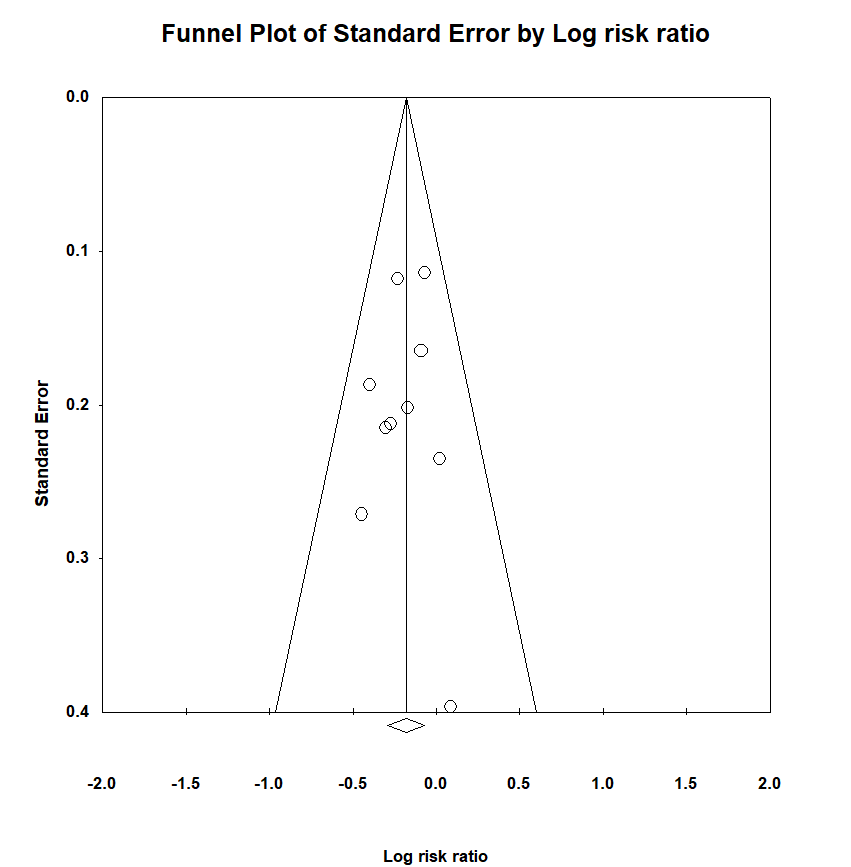
**

**Supplementary Figure 4:** Mortality funnel plot

**
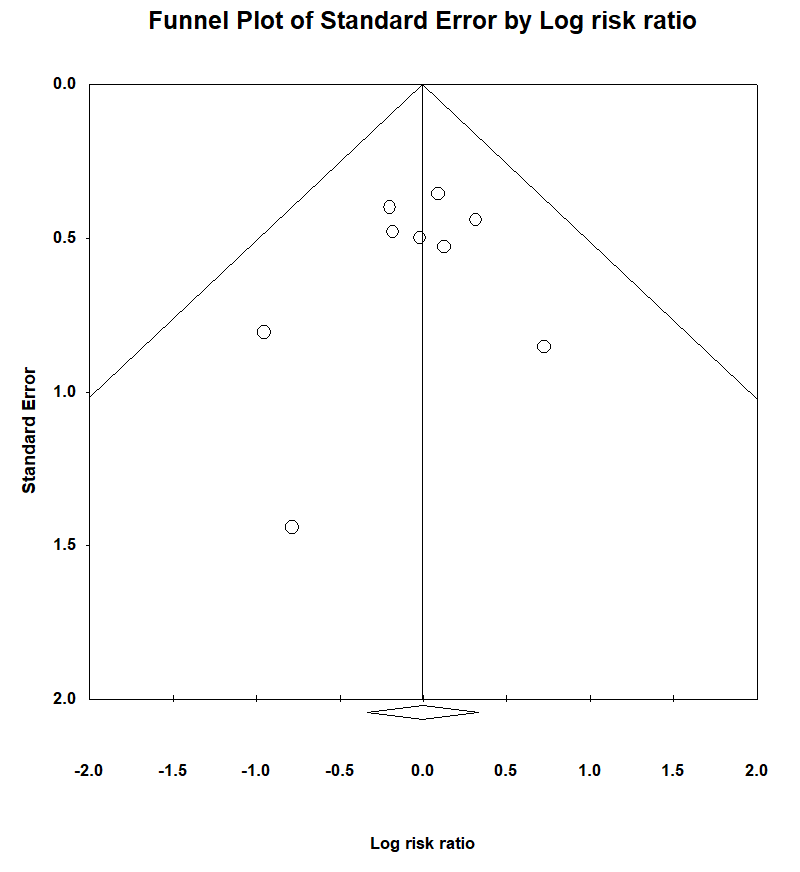
**

**Supplementary Figure 5:** Spontaneous intracerebral hemorrhage funnel plot

**
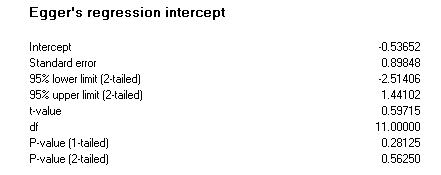
**

**Supplementary Figure 6:** Functional independence, Egger’s regression test

**
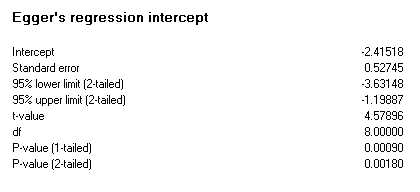
**

**Supplementary Figure 7:** Independent ambulation, Egger’s regression test


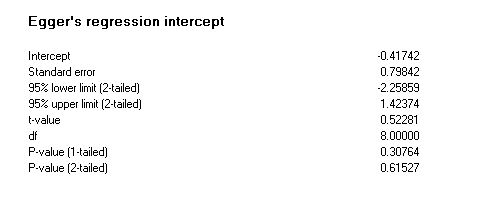


**Supplementary Figure 8:** Successful recanalization, Egger’s regression test

**
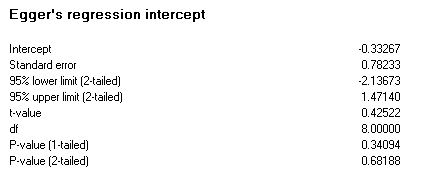
**

**Supplementary Figure 9:** Mortality, Egger’s regression test

**
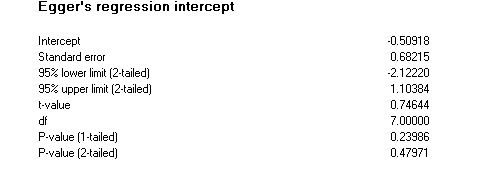
**

**Supplementary Figure 10:** Spontaneous intracerebral hemorrhage, Egger’s regression test
